# Supplementary material for: Design of a Proteolytically Stable Sodium-Calcium Exchanger 1 Activator Peptide for In Vivo Studies
Source: Front Pharmacol. 2021 Jun 7;12:638646. doi: 10.3389/fphar.2021.638646 (PMC8215385; doi:10.3389/fphar.2021.638646)
Supplement: Supplementary file 5 [file Table4.XLSX]

## Sheet: Table 4. NOPT
Table 4. NOPT
	Intensity NOPT	Intensity NOPT	Intensity NOPT	Intensity NOPT	Intensity NOPT	Intensity NOPT
Sequence	0h	4h	8h	12h	24h	48h
EIEQLIELANYQ	0	0	0	0	0	4955200
EIEQLIELANYQV	0	0	13015000	0	0	414020000
EQLIELANYQV	0	0	0	0	0	0
IEQLIELANYQV	0	0	0	0	0	20859000
KEIEQLIELANYQV	0	0	0	0	0	0
PYKEIEQL	88635000	0	224560000	242720000	0	442060000
PYKEIEQLI	0	0	0	0	0	1587200000
PYKEIEQLIE	13988000	0	164670000	295570000	0	3676500000
PYKEIEQLIEL	7135100	0	63329000	93921000	0	109290000
PYKEIEQLIELA	2445200	18070000	0	83794000	0	202620000
PYKEIEQLIELANY	0	0	0	0	0	0
PYKEIEQLIELANYQ	0	0	0	0	0	45831000
PYKEIEQLIELANYQV	6906600000	6743400000	8776900000	12686000000	7683000	4993300000
QLIELANY	0	1361400	0	0	0	0
QLIELANYQV	0	0	0	0	0	0
SUM	7018803300	6762831400	9242474000	13402005000	7683000	11496635200
PYKEIEQLIELANYQV/SUM (%)	98.4014	99.7127	94.9627	94.6575	100	43.4327
Relative intensity of NOPT (%)	100	101.333	96.5054	96.1953	101.625	44.1383
The 24h sample showed very low intensities and was therefore excluded (in gray)
